# Supplementary material for: VEGF Expression, Cellular Infiltration, and Intratumoral Collagen Levels after Electroporation-Based Treatment of Dogs with Cutaneous Squamous Cell Carcinoma
Source: MDPI journal article supplement (doi:10.3390/life11121321), 2021-11-30
Supplement: s1 [file s1]

## **Expression of vascular endothelial growth factor, cellular infiltration and evaluation of intratumoral collagen in dogs with cutaneous squamous cell carcinoma submitted to electroporation-based treatment**

Dos Anjos et al.

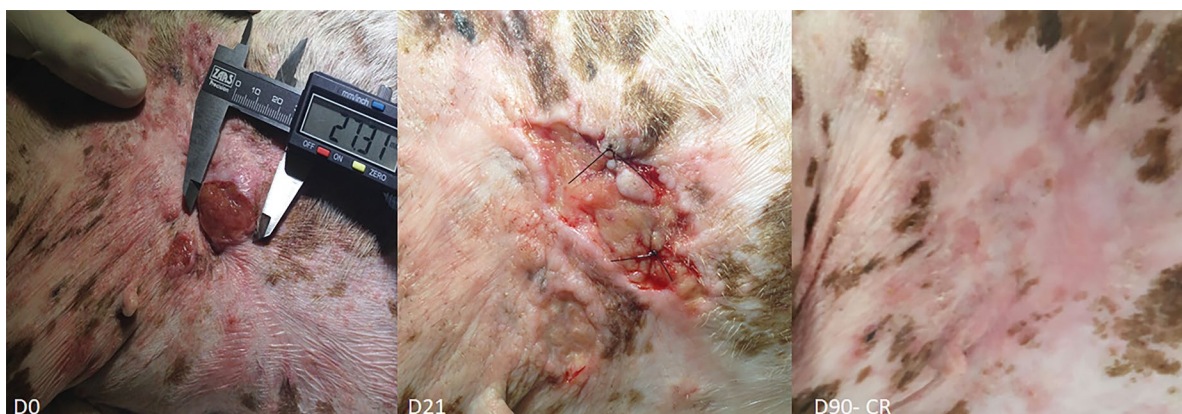

**Supplementary Figure S1.** Patient ID2 diagnosed with cutaneous SCC. It is possible to observe the macroscopic aspect of the lesion pre-, post-ECT treatment and in complete remission at day 90.
