# Supplementary material for: VEGF Expression, Cellular Infiltration, and Intratumoral Collagen Levels after Electroporation-Based Treatment of Dogs with Cutaneous Squamous Cell Carcinoma
Source: Life (Basel). 2021 Nov 30;11(12):1321. doi: 10.3390/life11121321 (PMC8708059; doi:10.3390/life11121321)
Supplement: Supplementary file 1 [file life-11-01321-s001.zip › Supplementary table S1.xlsx]

## Sheet: Data
Supplementary table S1: Expression of vascular endothelial growth factor (score and intensity), CD31 expression, cellular infiltration (subset and intensity), necrosis and intratumoral collagen by Masson’s trichrome (grade and intensity) pre (D0) and post-ECT (D21) treatment in dogs with cutaneous squamous cell carcinoma
ID	Breed	Age	Sex	Number of tumors	Tumor localization	Histopathological evaluation*	TNM	VEGF D0 Score	VEGF D21 Score	VEGF D0 Intensity	VEGF D21 Intensity	CD31 D0	CD31 D21	Masson's Trichrome D0	Masson's Trichrome D21	Grade Masson's Trichrome D0	Grade Masson's Trichrome D21	Necrosis D0	Necrosis D21	inflammatory infiltrate intratumoral D0	inflammatory infiltrate intratumoral D21	Grade inflammatory infiltrate intratumoral D0	Grade inflammatory infiltrate intratumoral D21	Outcome	Number of sessions	Survival
1	Pitbull	8	M	2 (a, b)	Axillar (a)	Poorly differentiated (grade 4)	T2N0M0	2	-	2	-	6.2	-	2	3	Weak	Strong	3	1	Mixed	Lymphoplasmocytic	Moderate	Severe	PR	3 / S	240 (NR)
					Preputial (b)	Well differentiated (grade 1)	T2N0M0	3	2	2	1	-	1.8	2	3	Weak	Strong	3	2	Neutrophilic	Mixed	Moderate	Moderate	PR
2	Pitbull	9	F	1	Abdominal	Well differentiated (grade 1)	T2N0M0	4	-	3	-	14.8	3	3	-	Weak	-	3	3	Mixed	Mixed	Mild	Mild	PR	2	>570
3	Boxer	2	F	1	Thorax lateral	Well differentiated (grade 1)	T3N0M0	4	2	2	1	1.4	9.2	2	3	Weak	Strong	0	0	Mixed	Mixed	Severe	Moderate	SD	2 / S	>480
4	Mixed	10	F	2 (a. b)	Thorax lateral (a)	Poorly differentiated (grade 4)	T2N0M0	2	-	1	-	2.6	7.2	3	3	Strong	Strong	0	0	Lymphoplasmocytic	-	Moderate	Moderate	PR	1 / S	90 (NR)
					Abdominal (b)	Well differentiated (grade 1)	T3N0M0	4	1	2	1	10.8	7.4	3	3	Weak	Strong	1	2	Lymphoplasmocytic	Mixed	Moderate	Moderate	PR
5	Mixed	7	F	1	Abdominal	Well differentiated (grade 2 and 3)	T3N0M0	2	2	1	1	2	1.8	3	3	Strong	Weak	0	3	Mixed	Mixed	Severe	Moderate	PD	2	90 (NF)
6	Pitbull	9	F	4 (a, b, c, d)	Thorax lateral (a)	Well differentiated (grade 2 and 3)	T1N0M0	3	4	2	2	0.8	7.4	1	1	Weak	Weak	2	2	Mixed	Lymphoplasmocytic	Severe	Mild	PR	2 / S	>420
					Abdominal (b)	Poorly differentiated (grade 4)	T3N0M0	2	2	1	2	2.4	7.6	3	1	Strong	Weak	3	1	Mixed	Mixed	Moderate	Moderate	PR
					Abdominal (c)	Well differentiated (grade 2 and 3)	T1N0M0	3	4	1	2	4.4	8	3	3	Strong	Strong	2	3	Mixed	Mixed	Moderate	Mild	PR
					Abdominal (d)	Well differentiated (grade 2 and 3)	T2N0M0	2	3	1	2	13	6.6	1	3	Weak	Weak	2	3	Mixed	Mixed	Severe	Moderate	PR
7	Mixed	NA	F	1	Abdominal	Well differentiated (grade 1)	T2N1M0	3	4	1	3	14.4	7	3	3	Strong	Strong	3	2	Neutrophilic	Neutrophilic	Mild	Mild	SD	2	90 (euthanasia)
8	Mixed	NA	F	2 (a. b)	Abdominal (a)	Well differentiated (grade 1)	T3N0M0	3	4	1	3	1.8	7.6	2	2	Weak	Weak	2	1	Mixed	Neutrophilic	Severe	Mild	PD	2	120 (euthanasia)
					Thorax lateral (b)	Well differentiated (grade 1)	T2N0M0	3	4	1	2	1.8	-	2	2	Strong	Strong	0	3	Mixed	Neutrophilic	Severe	Mild	PD
9	English Pointers	8	F	1	Abdominal	Well differentiated (grade 2 and 3)	T3N1M0	4	2	1	2	4.8	2	3	2	Strong	Strong	0	1	Neutrophilic	Lymphoplasmocytic	Moderate	Moderate	PR	2 / S	300
10	Boxer	8	F	2 (a. b)	Thorax lateral (a)	Well differentiated (grade 1)	T1N0M0	4	4	3	2	1.2	3.6	3	2	Strong	Strong	0	0	Mixed	Mixed	Moderate	Moderate	PR	2	>390
					Tibial (b)	Well differentiated (grade 1)	T1N0M0	-	-	4	2	1.6	12.8	3	2	Strong	Weak	0	2	Neutrophilic	Lymphoplasmocytic	Moderate	Moderate	PD
11	Mixed	7	F	1	Abdominal	Well differentiated (grade 1)	T4N1M0	4	2	1	1	12.6	11.2	2	2	Strong	Weak	1	2	Neutrophilic	Neutrophilic	Severe	Moderate	SD	1	32 (euthanasia)
M, male; F, female
PR: partial remission; SD: stable disease; PD: progressive disease
S: surgery
NR: death not related to cancer
NF: no follow-up
NA: not available
*Gross and Broder’s grade system
